1 **Imputed Gene Expression versus Single Nucleotide Polymorphism in Predicting**  
2 **Gray Matter Phenotypes**

3 Jiayu Chen<sup>1</sup>, Zening Fu<sup>1</sup>, Armin Iraj<sup>1,2</sup>, Vince D. Calhoun<sup>1,2,†</sup>, Jingyu Liu<sup>1,2,\*;†</sup>

4 <sup>1</sup>Tri-Institutional Center for Translational Research in Neuroimaging and Data Science (TReNDS):  
5 (Georgia State University, Georgia Institute of Technology, and Emory University), Atlanta, GA, USA;

6 <sup>2</sup>Department of Computer Science, Georgia State University, Atlanta, GA, USA

7 <sup>†</sup>Contributing equally.

8 \*Corresponding authors:

9 Jingyu Liu, 55 Park Pl NE, Atlanta, GA 30303, [jliu75@gsu.edu](mailto:jliu75@gsu.edu)

10 **Running title:** Imputed gene expression for prediction

11 **ABSTRACT**

12 Genetics plays an important role in psychiatric disorders. A clinically relevant question is whether we  
13 can predict psychiatric traits from genetics, which holds promise for early detection and tailored  
14 intervention. Imputed gene expression, also known as genetically-regulated expression (GRE), reflects the  
15 tissue-specific regulatory effects of multiple single nucleotide polymorphisms (SNPs) on genes. In this  
16 work, we explored the utility of GRE for trait association studies and how the GRE-based polygenic risk  
17 score (gPRS) compared with SNP-based PRS (sPRS) in predicting psychiatric traits. A total of 13  
18 schizophrenia-related gray matter networks identified in another study served as the target brain  
19 phenotypes for assessing genetic associations and prediction accuracies in 34,149 individuals from the  
20 UK Biobank cohort. GRE was computed leveraging MetaXcan and GTEx tools for 56,348 genes across  
21 13 available brain tissues. We then estimated the effects of individual SNPs and genes separately on each  
22 tested brain phenotype in the training set. The effect sizes were then used to compute gPRS and sPRS in  
23 the testing set, whose correlations with the brain phenotypes were used to assess the prediction accuracy.  
24 The results showed that, with the testing sample size set to 1,138, for training sample sizes from 1,138 up  
25 to 33,011, overall both gPRS and sPRS successfully predicted the brain phenotypes with significant  
26 correlations observed in the testing set, and higher accuracies noted for larger training sets. In addition,  
27 gPRS outperformed sPRS by showing significantly higher prediction accuracies across 13 brain  
28 phenotypes, with greater improvement noted for training sample sizes below ~15,000. These findings  
29 support that GRE may serve as the primary genetic variable in brain phenotype association and prediction  
30 studies. Future imaging genetic studies may consider GRE as an option depending on the available  
31 sample size.

32 **Key words:** SNP, imputed gene expression, transcriptome, prediction, gray matter

## 33 INTRODUCTION

34 Genetics is known to play an important role in psychiatric disorders<sup>1-3</sup>. Genetic influence is reflected  
35 in increased family risk and has been further quantified through family studies<sup>4-6</sup>. A recent study  
36 leveraging the Swedish sibling cohort conducted a comprehensive investigation on eight psychiatric traits  
37 and the reported heritability varied from 0.3 for major depressive disorder to 0.8 for attention-  
38 deficit/hyperactivity disorder, with an estimate of 0.6 for schizophrenia<sup>7</sup>. The significant progress in  
39 large-scale genome-wide association studies (GWASs) in the past decade provides more direct evidence  
40 for genetic effects on psychiatric disorders. Starting from the Psychiatric Genomic Consortium (PGC)  
41 GWAS of schizophrenia (SZ) as a milestone in 2014, GWASs started to yield reliable and generalizable  
42 risk single nucleotide polymorphisms (SNPs) for complex psychiatric traits of high polygenicity<sup>8-14</sup> with  
43 sample sizes exceeding 100K. These GWASs have not only revealed high-risk genomic loci, but also  
44 grounded new approaches of heritability estimation leveraging the genomic profiles<sup>15</sup>. The GWAS-based  
45 heritability estimates are usually lower than those from family studies but show significant correlations<sup>7</sup>.

46 At this point, a more clinically relevant question is whether we can predict a specific psychiatric trait  
47 from genetics, which holds promise for early detection and tailored intervention. Given the high  
48 polygenicity, the risk SNPs identified by GWASs in general show modest effect sizes and lack predictive  
49 power at the univariate level. This has motivated the polygenic risk score (PRS) approach that is to  
50 aggregate the effects of multiple SNPs with each SNP weighted by the effect size estimated from reliable  
51 GWASs. As a multivariate measure, PRS has shown improved power, e.g., roughly explaining 11% of the  
52 variance in liability for schizophrenia and 4% for bipolar disorder<sup>9,11,16</sup>. However, computing PRS  
53 requires a reliable GWAS with a decent sample size as a prerequisite, which is not always readily  
54 available. For instance, many behavioral and cognitive measures are more difficult to harmonize across  
55 cohorts<sup>17,18</sup>, making data aggregation more challenging. And GWASs of brain phenotypes are also  
56 lagging in terms of sample size<sup>19-22</sup>.

57 In parallel, there is another line of effort to integrate functional annotations with GWASs to improve  
58 statistical power and interpretability. One typical example is imputed gene expression, also known as  
59 genetically regulated expression (GREs)<sup>23</sup>. GREs are grounded by the observation that a subset of  
60 genomic SNPs regulate gene expression, so-called expression quantitative trait loci (eQTLs). Thus,  
61 leveraging public resources such as the Genotype-Tissue Expression (GTEx) project<sup>24</sup>, models can be  
62 constructed to characterize the relationships between the expression level of a specific gene and its tissue-  
63 specific eQTLs. This allows GREs to be imputed for any individuals provided that their genotypes are  
64 available<sup>23,25</sup>. And the gene-eQTL relationship can be combined with SNP-based GWAS summary  
65 statistics to estimate the effects of imputable genes on the traits that have been investigated in the  
66 GWASs, known as transcriptome-wide association studies (TWAS)<sup>26</sup>. Like PRS, TWAS also needs  
67 GWAS as a prerequisite, which is a limiting factor.

68 An intriguing question is whether it's feasible to conduct trait association studies using GREs as the  
69 primary genetic variable and how the GRE-based risk score (denoted as gPRS in the following text)  
70 compares with SNP-based PRS (denoted as sPRS) in predictive utility. For each imputable gene, the GRE  
71 combines the effects of multiple eQTLs, so theoretically we expect them to carry larger effect sizes than  
72 SNPs and boost statistical power in association tests. Indeed this is the motivation for proposing GRE,  
73 and finds support from the TWAS results<sup>26</sup>. With that said, one recent study computed gene expression-  
74 based risk scores using GREs weighted by TWAS effect sizes, which however did not outperform sPRS  
75 in predictive power at a sample size level of 50K<sup>27</sup>. There are two points here that deserve further  
76 investigation. First, rather than directly assessing the effects of genes, TWAS builds up gene-trait  
77 associations based on SNP-trait associations of available GWASs by integrating eQTL information. It  
78 remains unclear if we can circumvent GWAS to directly use GREs for trait association analyses and still  
79 obtain a gain in statistical power. Second, a more comprehensive investigation is needed to compare  
80 gPRS with sPRS in terms of predictive power for different levels of sample sizes. A possible scenario is  
81 that the gain of using GREs may be more substantial for smaller sample sizes, where SNPs associations

82 are more vulnerable to the power issue. And when the sample size becomes sufficiently large, sPRS is  
83 expected to outperform gPRS as the latter only leverages a portion of the genome (i.e., eQTLs).  
84 Considering that a sample size of 50K is not always accessible, it is important to examine how the  
85 performance varies with sample sizes, to inform future experimental designs.

86 The current work aims to assess the applicability of GREs in directly assessing gene-brain phenotype  
87 associations and the performance of the resulting gPRS in predictive brain phenotypes derived  
88 noninvasively from magnetic resonance imaging (MRI), particularly how it compares with sPRS across a  
89 range of sample sizes. We are particularly interested in brain phenotypes, as compared to GWASs of  
90 psychiatric disorders, understanding genetic contributors to brain abnormalities better informs the  
91 pathology. However, even with data aggregation, it is still difficult to reach a large sample size in GWASs  
92 of brain phenotypes, largely due to the availability of both imaging and genomic data. This has motivated  
93 the exploration of GREs for improved power with limited samples. In addition, GREs promise, to a  
94 certain level, tissue-specificity of genetic correlates underlying brain phenotypes, which is a tempting  
95 scenario given the difficulty in obtaining brain tissues. Specifically in this study, we conducted training  
96 and testing using the UK Biobank (UKB) data and compared the predictive power of gPRS and sPRS on  
97 SZ-related gray matter phenotypes derived from structural magnetic resonance imaging (sMRI) data.

## 98 **MATERIALS AND METHODS**

99 **UK Biobank.** The current work leveraged the population-based UKB cohort which recruited more  
100 than 500K individuals across the United Kingdom. The UKB study was approved by the North West  
101 Haydock Research Ethics Committee, and the data used in our work were obtained under data application  
102 number 34175. Specifically, we used the imputed SNP data and T1-weighted MRI data of 34,149  
103 European ancestry individuals with both modalities available after quality control (QC), including 16,063  
104 males and 18,086 females, aged between 45-81 with a median of 64 when brain MRI was collected.

105        **Genetic data.** The imputed SNP data released by UKB consisted of 487,320 individuals and ~96  
106 million variants (v3\_s487320). Details of genotyping and imputation can be found in the paper that  
107 describes the UKB genomic data<sup>28</sup>. In brief, DNA was extracted from blood samples and genotyping was  
108 carried out by Affymetrix Research Services Laboratory. Most of the individuals (94%) reported their  
109 ethnic background as ‘white’, which was a broad-level group. SHAPEIT3 was used for phasing<sup>29</sup>.  
110 Imputation was conducted using IMPUTE4<sup>28</sup> with the Haplotype Reference Consortium reference panel<sup>30</sup>  
111 and the UK10K Consortium reference panel<sup>31</sup>.

112        In this study, we first identified the participants that passed the UKB quality control (sex mismatch,  
113 missing rate, and heterozygosity) and also had sMRI data available. We then excluded SNPs with minor  
114 allele frequencies < 0.01, as recommended for subsequent GWAS and PRS analysis<sup>32</sup>. We then conducted  
115 relatedness estimation (identify-by-descent) using PLINK<sup>33</sup>. For each group of individuals that were  
116 second-degree relatives or closer, only one individual was retained for subsequent analysis. Finally we  
117 identified individuals of European ancestry (in a more strict sense) to be those close (< 3SD) to the center  
118 of the ‘white’ cluster as defined by the first four principal components.

119        **Structural MRI data.** The UKB imaging enhancement plan starting in 2014 highlights the aim of re-  
120 inviting 100K participants for multi-modal imaging<sup>34</sup>. The data we used contain T1 scans of ~37K  
121 individuals. UKB used identical scanner models, coils, software, and protocols across centers to ensure  
122 data harmonization as much as possible. The T1 scans used the magnetization-prepared rapid acquisition  
123 with gradient echo sequence, resolution = 1.0 mm × 1.0 mm × 1.0 mm, matrix = 256 × 256 × 208, TI =  
124 880 ms, TR = 2000 ms, parallel imaging acceleration factor = 2.

125        The whole brain T1-weighted data were preprocessed using the standard statistical parametric  
126 mapping 12 voxel-based morphometry pipeline as described in our previous work<sup>35,36</sup>. With the unified  
127 model integrating image registration, bias correction, and tissue classification, the resulting gray matter  
128 volume (GMV) images were estimated by the modulated method and then resliced to 1.5 mm × 1.5 mm ×

129 1.5 mm. The resliced GMV images were further smoothed by a 6 mm full width at half-maximum  
130 Gaussian kernel. We calculated the gray matter mask based on the average GMV  $> 0.2$ , which included  
131 416,407 gray matter voxels for further analyses. We excluded 55 outlier participants whose GMV profiles  
132 (masked) showed correlations  $< 0.8$  with the average GMV profile across all the participants.

133 **Imputation of gene expression.** MetaXcan was used to impute gene expression from genotypes<sup>25</sup>  
134 leveraging the GTEx V8 release<sup>24</sup> for eQTL information. Given the goal to evaluate the predictive power  
135 of gPRS for brain phenotypes, we chose to focus on the GREs of brain tissues. The imputed SNPs that  
136 passed the aforementioned quality control (QC) were used as input. As a result, a total of 56,348 genes  
137 were successfully imputed across 13 available brain tissues. **Figure 1a** shows a breakdown of the number  
138 of imputed genes for individual brain tissues.

139 **Gray matter phenotypes.** This work investigated a total of 13 SZ-related brain networks for  
140 predictability by genetics. These brain networks were derived by applying independent component  
141 analysis (ICA)<sup>37,38</sup> to GMV data from other studies (COBRE, FBIRN, and BSNIP<sup>36,39</sup>), called source-  
142 based morphometry<sup>40</sup>. ICA decomposes the GMV data into a linear combination of maximally spatial-  
143 independent components. Each component or brain network essentially identifies a pattern of voxels with  
144 covarying GMV patterns, and the component's associated loadings reflect how this brain network is  
145 weighted or expressed in different subjects. For these 13 brain networks, their loadings have been found  
146 to show robust SZ relevance across cohorts of different age ranges, including significant group  
147 differences between controls and individuals with SZ in adults, significant associations with Structured  
148 Clinical Interview for DSM-5 (SCID) SZ scale in young adults, as well as significant associations with  
149 prodromal psychosis scale in adolescents (unpublished data). **Figure 1b** shows the spatial maps of these  
150 13 SZ-related GMV networks, where the red and blue colormaps indicate that the original voxel-level  
151 GMVs were positively or negatively correlated with the component loadings extracted by ICA, or the  
152 brain phenotypes tested in the current work. For all these highlighted brain regions, cases with SZ showed  
153 lower GMV compared to controls.

| a | Brain tissue                   | N_genes | Brain tissue                    | N_genes | Brain tissue             | N_genes |
|---|--------------------------------|---------|---------------------------------|---------|--------------------------|---------|
|   | Amygdala                       | 2784    | Cortex                          | 5493    | Putamen_basal_ganglia    | 4434    |
|   | Anterior_cingulate_cortex_BA24 | 3542    | Frontal_Cortex_BA9              | 4560    | Spinal_cord_cervical_c-1 | 3250    |
|   | Caudate_basal_ganglia          | 5002    | Hippocampus                     | 3687    | Substantia_nigra         | 2558    |
|   | Cerebellar_Hemisphere          | 5750    | Hypothalamus                    | 3650    |                          |         |
|   | Cerebellum                     | 6788    | Nucleus_accumbens_basal_ganglia | 4850    |                          |         |

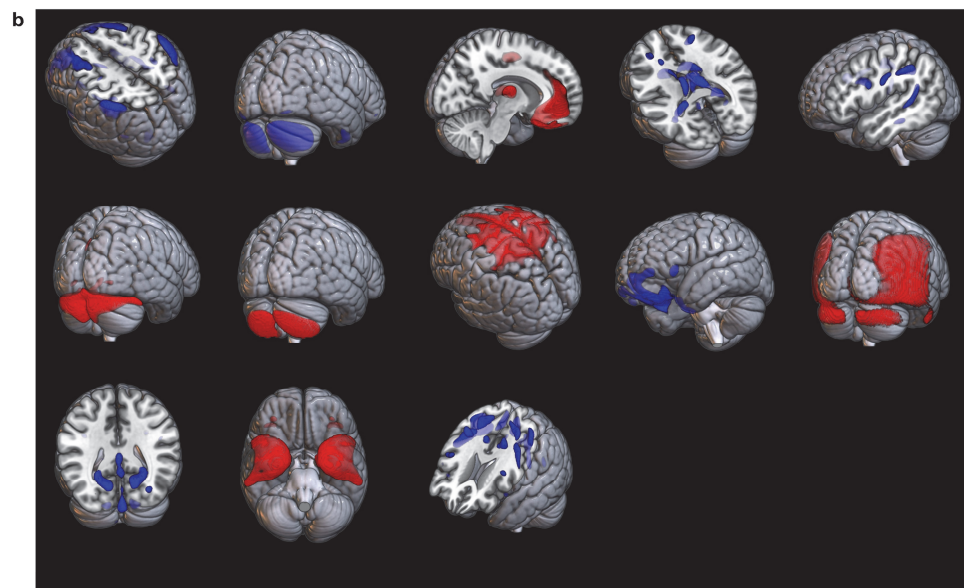

154  
155 Figure 1: (a) A summary of imputed genes for each of the 13 brain tissues; (b) Spatial maps of the 13 schizophrenia-  
156 related brain networks.

157 We conducted spatially-constrained ICA, an sMRI version of our fully automated NeuroMark  
158 pipeline<sup>41</sup>, on the UKB GMV data with the 13 SZ-related brain networks serving as references. This  
159 pipeline allowed obtaining brain networks for the UKB individuals that corresponded to the reference  
160 networks while allowing variations specific to the UKB data. Similarly, this pipeline yielded associated  
161 loadings of components that reflected the weights of brain networks on subjects, which were used as gray  
162 matter phenotypes to be predicted by GREs.

163 **SNP-based polygenic risk score.** First we made sure that the QC was calibrated with those  
164 recommended for GWAS and PRS analysis<sup>32,42</sup>. We then chose to prune the SNP data before running  
165 GWAS, rather than conducting GWAS on unpruned data followed by clumping + thresholding, mainly to  
166 reduce computation burden<sup>32,42</sup>. The QC'd SNPs went through a heavy pruning ( $r^2 < 0.1$ , 500 kb window)  
167 resulting in 208,752 autosomal SNPs. GWAS was conducted on the training data using PLINK to assess  
168 the additive effects of individual SNPs on one brain phenotype (continuous variable) at a time. Age, sex,



169 MRI scanning site, as well as the top 5 principal components of the genomic SNP data were included as  
170 covariates. Then in the testing data sPRS represented the combined effects of SNPs that passed the  
171 specified p-value threshold. In this work, we tested five p-value thresholds including 0.0001, 0.05, 0.1,  
172 0.5, and 1.

173 **Gene-based polygenic risk score (gPRS).** The GREs of imputed 56,348 genes across 13 brain  
174 tissues were assessed for associations with each brain phenotype using a regression model in the training  
175 data, controlling for age, sex, MRI scanning site, and the top 5 principal components for population  
176 structure. The previous work suggested that in general, the full model (p-value threshold = 1) multi-tissue  
177 gene risk scores showed stronger predictive power<sup>27</sup>. Consequently, in this work gPRS represented the  
178 combined effect of all the GREs from 13 brain tissues.

179 It is not well established whether pruning is needed for gene-based risk scores, given that each gene  
180 has its own biological function and impact on the traits. With that said, to address the concern of  
181 including highly correlated genes might inflate the associations between the resulting gPRS and gray  
182 matter phenotypes, we also examined how gPRS with pruning compared with sPRS in prediction.  
183 Specifically, we conducted a 500K-window pruning with  $r^2 < 0.16$  on all the 56,348 imputed genes across  
184 13 brain tissues. After pruning, a total of 16,527 tissue-specific gene markers were retained for gPRS  
185 analysis, denoted as gPRS\_pruned in the following text.

186 **Training and testing.** The UKB data were partitioned into 30 folds to examine the impact of training  
187 sample size on the predictive power of sPRS and gPRS. For each random partition, one fold of 1,138  
188 individuals was used for testing, while the training sample size increased from one fold (N = 1138) up to  
189 29 folds (N = 33,011). For each training set, we estimated the effects of individual SNPs and genes on  
190 brain phenotypes as described above. The resulting summary statistics were then used to compute sPRS  
191 and gPRS in the hold-out testing set (i.e., predicted brain phenotypes). The correlations (R) between the  
192 predicted and observed brain phenotypes were employed as a metric of prediction accuracy. A total of

193 five random partitions were conducted to characterize how the overall predictive power for all the brain  
194 phenotypes varied with training sample size, and if there were any statistical differences in the predictive  
195 power between sPRS and gPRS.

196 **Heritability.** We also examined how heritability might impact sPRS and gPRS performance. We  
197 conducted GWAS on each brain phenotype using the common SNPs of the QC'ed UKB data and the  
198 HapMap SNPs, as recommended by the LD Score (LDSC) regression tool<sup>15</sup>. The full UKB data covering  
199 34,149 European ancestry individuals were included in the GWAS for heritability analysis. Additive  
200 effects were evaluated for individual SNPs, controlling for the same covariates as described above.  
201 Finally, heritability was estimated for each brain phenotype based on the summary statistics.

## 202 RESULTS

203 **Figure 2a** shows how prediction accuracies varied across the tested range of training sample sizes for  
204 both gPRS and sPRS, where five different p-value thresholds were explored for sPRS from 0.0001 up to  
205 1. **Figure 2b** shows the prediction accuracies of gPRS\_pruned compared with gPRS and sPRS. Each data  
206 point and its confidence interval reflect the mean and standard error of the observed prediction accuracies  
207 across 13 brain phenotypes and 5 random partitions for a specific training sample size. It can be seen that,  
208 overall, sPRS prediction accuracies improved with higher p-value thresholds and more SNPs included.  
209 This performance improvement saturated around the p-value threshold of 0.5, given that the prediction  
210 accuracies didn't differ significantly between the p-value threshold of 0.5 and 1. We then focused on  
211 sPRS with a p-value threshold of 1 for the primary comparison with gPRS.

212 Both gPRS and sPRS showed improved prediction accuracies with increasing training sample sizes.  
213 Starting from a training sample size of ~1,100, the mean accuracy of gPRS increased from ~0.04 up to  
214 ~0.14 at a training sample size of ~33K. In parallel, the mean prediction accuracy of sPRS increased from  
215 ~0.024 to 0.11. Notably, the training sample size was capped at ~33K in the current study, and the

216 increasing trend of prediction accuracies hadn't shown any obvious sign of saturation. With pruning,  
 217 gPRS\_pruned still outperformed sPRS, although showing lower accuracies compared to gPRS.

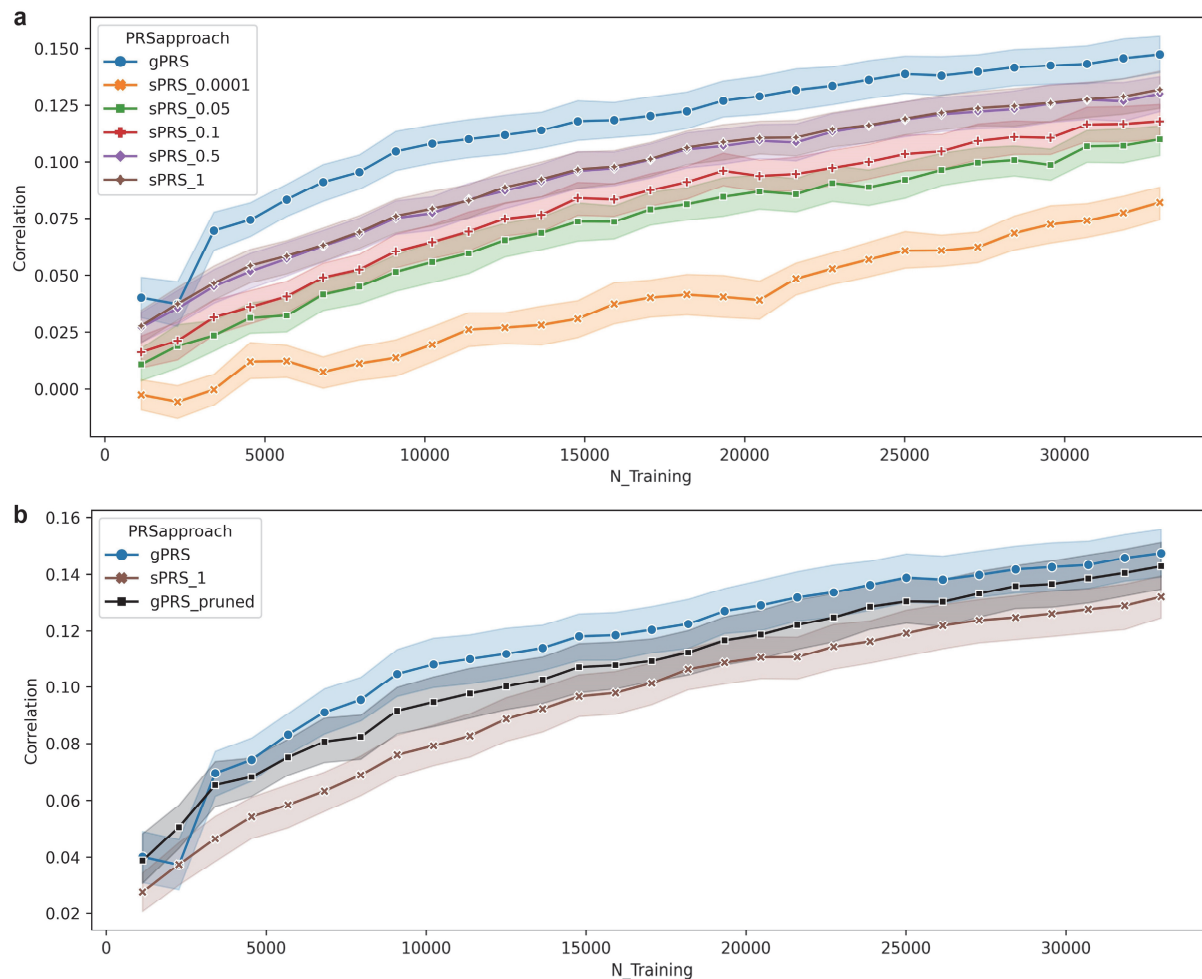

218  
 219 Figure 2: (a): Changes in prediction accuracies with increasing training sample sizes. Each data point reflects the  
 220 mean and standard error of the prediction accuracies observed from all 13 brain phenotypes across 5 random  
 221 partitions at a specific training sample size. For the sPRS approach, the results of all the tested p-value thresholds  
 222 from 0.0001 up to 1 are provided. (b): Prediction accuracies of gPRS\_pruned compared with gPRS and sPRS.

223 **Figure 3** shows the side-by-side violin plots of gPRS and sPRS predictive accuracies for all the tested  
 224 training sample sizes. For each sample size, we conducted a two-sample t-test based on the prediction  
 225 accuracies of 13 gray matter phenotypes and 5 random partitions, to examine whether gPRS outperformed  
 226 sPRS. Detailed statistics are also included, where a positive t-value indicates gPRS showing a higher  
 227 mean prediction accuracy compared to sPRS. For almost all the tested sample sizes, gPRS showed  
 228 significantly higher prediction accuracies than sPRS, with p-values ranging from 0.04 to the lowest

229 1.37E-06 which was observed at a training sample size of 6,828. The only exception was that no  
 230 significant difference was noted for a training sample size of 2,276.

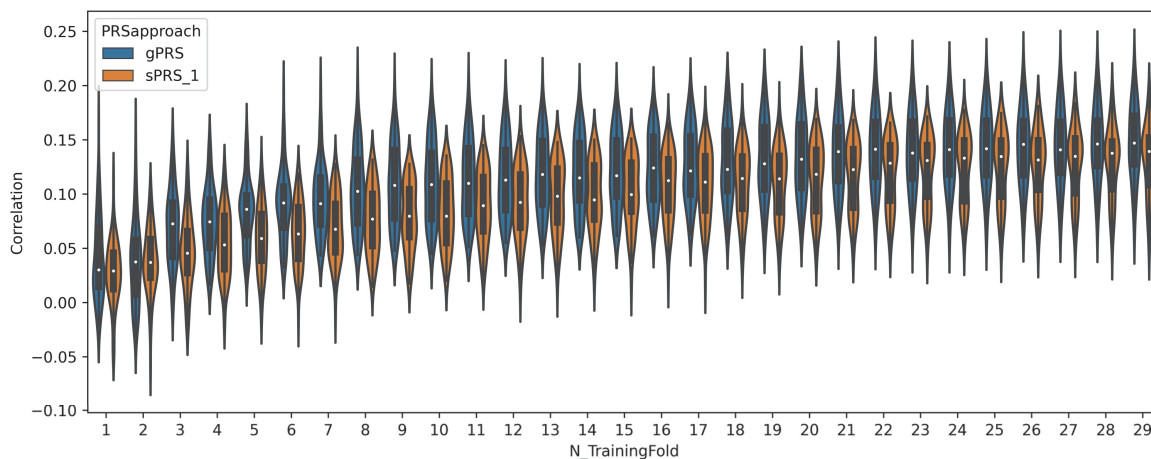

|                   |          |          |          |          |          |          |          |          |          |          |
|-------------------|----------|----------|----------|----------|----------|----------|----------|----------|----------|----------|
| <b>N_Training</b> | 1,138    | 2,276    | 3,414    | 4,552    | 5,690    | 6,828    | 7,966    | 9,104    | 10,242   | 11,380   |
| <b>t-value</b>    | 0.0124   | -0.0001  | 0.0231   | 0.0201   | 0.0248   | 0.0278   | 0.0265   | 0.0286   | 0.0289   | 0.0273   |
| <b>p-value</b>    | 4.00E-02 | 9.84E-01 | 1.27E-04 | 3.15E-04 | 8.17E-06 | 1.37E-06 | 3.78E-06 | 3.83E-06 | 3.03E-06 | 1.23E-05 |
| <b>N_Training</b> | 12,518   | 13,656   | 14,794   | 15,932   | 17,070   | 18,208   | 19,346   | 20,484   | 21,622   | 22,760   |
| <b>t-value</b>    | 0.0233   | 0.0218   | 0.0215   | 0.0207   | 0.0192   | 0.0161   | 0.0183   | 0.0184   | 0.0210   | 0.0192   |
| <b>p-value</b>    | 1.42E-04 | 3.07E-04 | 4.11E-04 | 5.32E-04 | 1.17E-03 | 4.86E-03 | 1.82E-03 | 2.20E-03 | 5.95E-04 | 1.69E-03 |
| <b>N_Training</b> | 23,898   | 25,036   | 26,174   | 27,312   | 28,450   | 29,588   | 30,726   | 31,864   | 33,002   |          |
| <b>t-value</b>    | 0.0199   | 0.0196   | 0.0162   | 0.0160   | 0.0169   | 0.0164   | 0.0156   | 0.0168   | 0.0154   |          |
| <b>p-value</b>    | 9.36E-04 | 1.05E-03 | 6.61E-03 | 6.33E-03 | 4.65E-03 | 5.82E-03 | 9.04E-03 | 4.73E-03 | 9.99E-03 |          |

231  
 232 Figure 3: Comparison of prediction accuracies between gPRS and sPRS across the whole tested range of training  
 233 sample sizes. For each training sample size, the violin plots show the distributions of prediction accuracies of 13  
 234 brain phenotypes across 5 random partitions of gPRS and sPRS respectively. The table below summarizes the t-  
 235 values and p-values of the two-sample t-tests.

236 We also examined how heritability might impact the gPRS and sPRS prediction accuracies. **Figure 4**  
 237 shows how prediction accuracies varied across brain networks showing different levels of heritability.  
 238 Each data point indicates the mean prediction accuracy (along with the confidence interval) across all the  
 239 training sample sizes for one specific brain phenotype, sorted by heritability. All the brain phenotypes  
 240 were significantly heritable, with estimated  $h^2$  ranging from 0.28 to 0.35. Meanwhile, no significant  
 241 association was observed between the estimated heritability and the sPRS/gPRS prediction performance.  
 242 Despite discrepancies noted for 2 out of 13 brain phenotypes, the predictability was consistent between  
 243 sPRS and gPRS for the remaining brain phenotypes, where a higher gPRS accuracy was accompanied by

244 a higher sPRS accuracy. And gPRS showed improved prediction accuracies for most of the brain  
 245 phenotypes compared to sPRS, while comparable accuracies were noted for the rest.

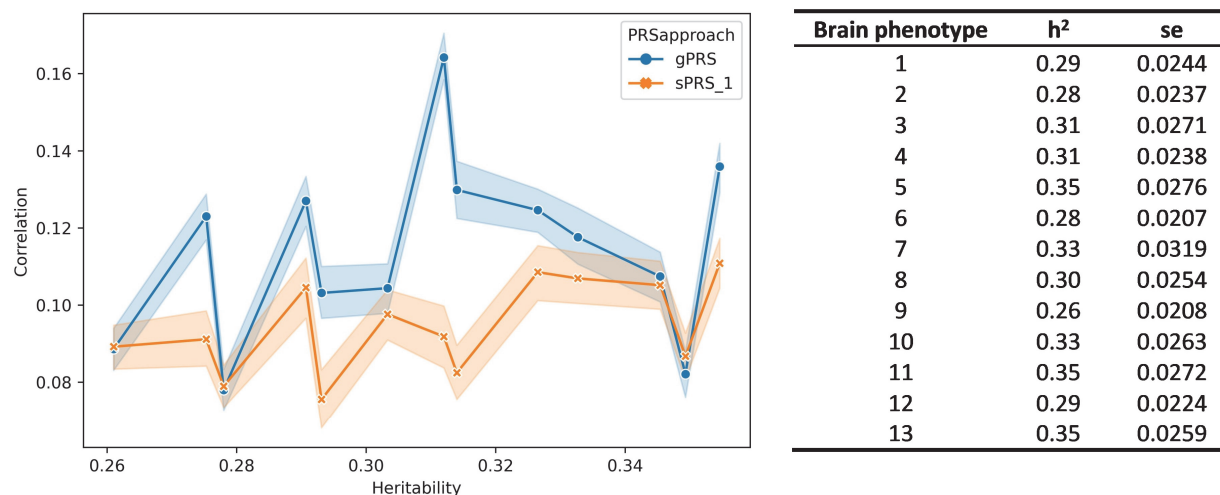

246  
 247 Figure 4: Scatter plots of prediction accuracies versus estimated heritability of the schizophrenia-related brain  
 248 networks. Each data point reflects the mean and standard error of the prediction accuracies observed from all the  
 249 training sample sizes across 5 random partitions for a specific brain phenotype.

## 250 DISCUSSION

251 We investigated the applicability of GREs for directly assessing gene-brain phenotypes associations  
 252 and gPRS prediction. A total of 13 SZ-related gray matter networks were employed as brain phenotypes.  
 253 We partitioned the UKB data into training and testing sets to compare the predictive power of gPRS and  
 254 sPRS on these brain phenotypes, and how the predictive power varied across a wide range of training  
 255 sample sizes.

256 As expected, both sPRS and gPRS showed improved predictive power with increasing training  
 257 sample sizes. Also, both curves showed sharper increases at smaller sample sizes in which increasing the  
 258 training samples by 1,000 yielded more gain in prediction accuracy compared to a sample size increase  
 259 from 20,000 to 21,000. With that said, the prediction accuracy curve did not quite saturate at the largest  
 260 tested sample size of 33K. It remains a question what the most cost-effective sample size should be for  
 261 this type of risk score study of brain phenotypes, which also depends on the trait heritability, polygenicity,  
 262 risk prevalence, etc.

263 The gPRS computed based on GREs reliably predicted gray matter phenotypes, even at small training  
264 sample sizes. With only 1,138 training samples, the gPRS prediction accuracies observed across 13 gray  
265 matter networks and 5 random partitions were significantly greater than 0. It should be emphasized that  
266 the computation of gPRS didn't leverage any large-scale GWAS. The results support that GREs can be  
267 used as primary genetic variables for directly assessing gene-brain phenotype associations and can yield  
268 generalizable results with a reasonable sample size.

269 It's noted that gPRS, either without or with pruning, outperformed sPRS in predictive power for  
270 almost the whole tested range of training sample sizes. The main comparison as shown in Figures 2 and 3  
271 was based on the prediction accuracies across all the 13 networks and 5 random partitions, which was  
272 expected to better characterize the overall predictive power and how it related to the training sample size.  
273 Furthermore, Figure 4 shows the gPRS and sPRS prediction accuracies of individual gray matter  
274 networks, where the improvement in gPRS prediction was relatively evenly distributed across all the 13  
275 networks, rather than being majorly driven by one brain network. These findings lend support that gPRS  
276 presents improved prediction accuracies on brain phenotypes in a general sense, which does not appear to  
277 be specific to certain brain regions. More significant improvement in prediction was noted for a sample  
278 size range of ~3000-15000, where using gPRS improved the mean prediction accuracy by 0.019-0.029. At  
279 larger sample sizes, the sPRS performance was more comparable to gPRS, although gPRS remained to  
280 show significantly higher accuracies up to 33K. This observation echoes the speculation that imputed  
281 genes, as a multivariate factor of SNPs, alleviate the issue of modest effect sizes and the gain of using  
282 GREs is more substantial for smaller sample sizes. Meanwhile, larger sample sizes above 33K need to be  
283 tested to locate the range where sPRS outperforms gPRS by leveraging the whole genome rather than just  
284 eQTLs. Collectively, these findings promote GREs over SNPs for brain phenotype association and  
285 prediction analysis with a sample size below 30K.

286 One speculation is that the improved prediction noted in gPRS might be related to tissue-specificity.  
287 Only imputed genes of brain tissues were used to compute gPRS, which was expected to align better with



288 the target traits of brain phenotypes. While GREs reflect multivariate regulatory effects of SNPs, using  
289 only imputed genes of brain tissues is equivalent to applying a screening on SNPs, such that only SNPs  
290 known to regulate gene expression levels in those brain tissues were included for assessment. Excluding  
291 SNPs that are less likely to directly impact the brain may help reduce the background noise in gPRS,  
292 which is expected to benefit more when the sample size is low. This is also consistent with the notion that  
293 independent filtering help boost detection power for high-throughput experiments<sup>43</sup>.

294 Both sPRS and gPRS reflect the genetic effects on the traits. As a result, the resulting prediction  
295 accuracies are expected to be capped by heritability. In the current work, all the tested brain phenotypes  
296 showed significant heritabilities, justifying their predictability by genetics. Meanwhile, no significant  
297 association was noted between heritability and prediction accuracies, which might be due to the observed  
298 heritabilities varied in a relatively narrow range of 0.28-0.35, where the impact on prediction might not be  
299 reliably captured across 13 gray matter traits. Besides, the observed prediction accuracies were well  
300 below the theoretical upper limit as indicated by heritability, suggesting that the linear model of weighted  
301 sum might not capture all the genetic effects on the traits, and more sophisticated models are needed to  
302 further boost the predictive power.

303 The current work should be interpreted in light of the following limitations. First, we did not test all  
304 the PRS approaches available for SNPs, some of which such as PRS with adaptive shrinkage had been  
305 reported to show improved association and prediction power compared to PRS with a simple pruning.  
306 Given that not many as sophisticated approaches were available for genes, we chose to compare gPRS  
307 with sPRS yielded by a comparable simple model. It remains to be elucidated whether gPRS performance  
308 could also benefit from more advanced learning processes as sPRS did. Second, we did not optimize the  
309 p-value threshold of sPRS for individual training and testing sets using nested cross-validation.  
310 Meanwhile, we did test five p-value thresholds from 0.0001 to 1, and the results consistently indicated  
311 that a higher p-value threshold with more SNPs included for sPRS overall yielded improved prediction  
312 accuracies on the 13 gray matter phenotypes across all the tested training sample sizes. A more detailed

313 breakdown of how prediction accuracies changed with p-value thresholds for individual brain phenotypes  
314 and random partitions (Figure S1) further confirmed the consistency in performance improvement. These  
315 observations suggest that although not finely tuned for optimal prediction in each test, the reported main  
316 results of sPRS with a p-value threshold of 1 are not expected to be dramatically poorer than the optimal  
317 accuracy. And this should not impact the comparison between sPRS and gPRS, given the latter was not  
318 test-optimized either. Third, the training sample size was capped at ~33K, where we hadn't seen a turning  
319 point where sPRS started to outperform gPRS. This needs to be explored further to better inform future  
320 experiment designs. Fourth, the current work only assessed gPRS and sPRS performances on 13 SZ-  
321 related gray matter networks. We still need to answer whether the observations generalize to other  
322 imaging modalities, such as functional and diffusion MRI measures, and other behavioral and cognitive  
323 measures, as well as clinical assessments. Fifth, while PRS is a linear model, it deserves further  
324 investigation whether GREs also promise improved power in nonlinear models such as deep neural  
325 networks.

326 In summary, we provide evidence that GREs hold promise for serving as the primary genetic variable  
327 in brain phenotype association and prediction studies, which are likely more powered than SNPs,  
328 particularly when the sample size is relatively small ( $< 15K$ ). Future imaging genetic studies may  
329 consider GREs as an option depending on the available sample size.

### 330 **ACKNOWLEDGEMENTS**

331 This project was funded by the National Institutes of Health (P20GM103472, R01EB005846,  
332 1R01EB006841, R01MH106655, 5R01MH094524) and the National Science Foundation (1539067).

### 333 **COMPETING FINANCIAL INTERESTS**

334 The authors declare no conflict of interest.



## 335 REFERENCES

- 336 1. Sullivan PF, Daly MJ, O'Donovan M. Genetic architectures of psychiatric disorders: the emerging  
337 picture and its implications. *Nat Rev Genet.* 2012;13(8):537-551.
- 338 2. Sullivan PF, Agrawal A, Bulik CM, et al. Psychiatric Genomics: An Update and an Agenda. *Am J*  
339 *Psychiat.* 2018;175(1):15-27.
- 340 3. Grotzinger AD, Mallard TT, Akingbuwa WA, et al. Genetic architecture of 11 major psychiatric  
341 disorders at biobehavioral, functional genomic and molecular genetic levels of analysis. *Nat*  
342 *Genet.* 2022;54(5):548-559.
- 343 4. Cardno AG, Marshall EJ, Coid B, et al. Heritability estimates for psychotic disorders: the  
344 Maudsley twin psychosis series. *Arch Gen Psychiat.* 1999;56(2):162-168.
- 345 5. Shih RA, Belmonte PL, Zandi PP. A review of the evidence from family, twin and adoption  
346 studies for a genetic contribution to adult psychiatric disorders. *International review of*  
347 *psychiatry.* 2004;16(4):260-283.
- 348 6. Baselmans BM, Yengo L, van Rheenen W, Wray NR. Risk in relatives, heritability, SNP-based  
349 heritability, and genetic correlations in psychiatric disorders: a review. *Biol Psychiat.*  
350 2021;89(1):11-19.
- 351 7. Pettersson E, Lichtenstein P, Larsson H, et al. Genetic influences on eight psychiatric disorders  
352 based on family data of 4 408 646 full and half-siblings, and genetic data of 333 748 cases and  
353 controls. *Psychol Med.* 2019;49(7):1166-1173.
- 354 8. Ripke S, Neale BM, Corvin A, et al. Biological insights from 108 schizophrenia-associated  
355 genetic loci. *Nature.* 2014;511(7510):421-+.
- 356 9. Ripke S, Workgroup PS. PGC SCZ WORKGROUP: GWAS WITH OVER 70.000 CASES AND  
357 100,000 CONTROLS. *Eur Neuropsychopharm.* 2019;29:S814.
- 358 10. Ruderfer DM, Ripke S, McQuillin A, et al. Genomic Dissection of Bipolar Disorder and  
359 Schizophrenia, Including 28 Subphenotypes. *Cell.* 2018;173(7):1705-+.
- 360 11. Stahl EA, Breen G, Forstner AJ, et al. Genome-wide association study identifies 30 loci  
361 associated with bipolar disorder. *Nat Genet.* 2019;51(5):793-803.
- 362 12. Wray NR, Ripke S, Mattheisen M, et al. Genome-wide association analyses identify 44 risk  
363 variants and refine the genetic architecture of major depression. *Nat Genet.* 2018;50(5):668-+.
- 364 13. Demontis D, Walters RK, Martin J, et al. Discovery of the first genome-wide significant risk loci  
365 for attention deficit/hyperactivity disorder. *Nat Genet.* 2019;51(1):63-75.
- 366 14. Grove J, Ripke S, Als TD, et al. Identification of common genetic risk variants for autism  
367 spectrum disorder. *Nat Genet.* 2019;51(3):431-444.
- 368 15. Bulik-Sullivan BK, Loh P-R, Finucane HK, et al. LD Score regression distinguishes confounding  
369 from polygenicity in genome-wide association studies. *Nat Genet.* 2015;47(3):291-295.
- 370 16. Murray GK, Lin T, Austin J, McGrath JJ, Hickie IB, Wray NR. Could polygenic risk scores be  
371 useful in psychiatry?: a review. *Jama Psychiat.* 2021;78(2):210-219.
- 372 17. Kennedy E, Vadlamani S, Lindsey HM, et al. Bridging Big Data: Procedures for Combining Non-  
373 equivalent Cognitive Measures from the ENIGMA Consortium. *bioRxiv.* 2023:2023.2001.  
374 2016.524331.
- 375 18. Campos AI, Van Velzen LS, Veltman DJ, et al. Concurrent validity and reliability of suicide risk  
376 assessment instruments: A meta-analysis of 20 instruments across 27 international cohorts.  
377 *Neuropsychology.* 2023;37(3):315.
- 378 19. van Erp TGM, Walton E, Hibar DP, et al. Cortical Brain Abnormalities in 4474 Individuals With  
379 Schizophrenia and 5098 Control Subjects via the Enhancing Neuro Imaging Genetics Through  
380 Meta Analysis (ENIGMA) Consortium. *Biol Psychiat.* 2018;84(9):644-654.
- 381 20. Franke B, Stein JL, Ripke S, et al. Genetic influences on schizophrenia and subcortical brain  
382 volumes: large-scale proof of concept. *Nat Neurosci.* 2016;19(3):420-431.

- 383 21. McWhinney SR, Brosch K, Calhoun VD, et al. Obesity and brain structure in schizophrenia–  
384 ENIGMA study in 3021 individuals. *Mol Psychiatr*. 2022;1-7.
- 385 22. Schijven D, Postema MC, Fukunaga M, et al. Large-scale analysis of structural brain  
386 asymmetries in schizophrenia via the ENIGMA consortium. *Proceedings of the National  
387 Academy of Sciences*. 2023;120(14):e2213880120.
- 388 23. Gamazon ER, Wheeler HE, Shah KP, et al. A gene-based association method for mapping traits  
389 using reference transcriptome data. *Nat Genet*. 2015;47(9):1091-+.
- 390 24. Ardlie KG, DeLuca DS, Segre AV, et al. The Genotype-Tissue Expression (GTEx) pilot analysis:  
391 Multitissue gene regulation in humans. *Science*. 2015;348(6235):648-660.
- 392 25. Barbeira AN, Dickinson SP, Bonazzola R, et al. Exploring the phenotypic consequences of tissue  
393 specific gene expression variation inferred from GWAS summary statistics. *Nat Commun*.  
394 2018;9(1):1-20.
- 395 26. Gusev A, Ko A, Shi H, et al. Integrative approaches for large-scale transcriptome-wide  
396 association studies. *Nat Genet*. 2016;48(3):245-252.
- 397 27. Pain O, Glanville KP, Hagenaaars S, et al. Imputed gene expression risk scores: a functionally  
398 informed component of polygenic risk. *Hum Mol Genet*. 2021;30(8):727-738.
- 399 28. Bycroft C, Freeman C, Petkova D, et al. The UK Biobank resource with deep phenotyping and  
400 genomic data. *Nature*. 2018;562(7726):203-209.
- 401 29. O'Connell J, Sharp K, Shrine N, et al. Haplotype estimation for biobank-scale data sets. *Nat  
402 Genet*. 2016;48(7):817-820.
- 403 30. A reference panel of 64,976 haplotypes for genotype imputation. *Nat Genet*. 2016;48(10):1279-  
404 1283.
- 405 31. Huang J, Howie B, McCarthy S, et al. Improved imputation of low-frequency and rare variants  
406 using the UK10K haplotype reference panel. *Nat Commun*. 2015;6(1):8111.
- 407 32. Choi SW, Mak TS-H, O'Reilly PF. Tutorial: a guide to performing polygenic risk score analyses.  
408 *Nat Protoc*. 2020;15(9):2759-2772.
- 409 33. Purcell S, Neale B, Todd-Brown K, et al. PLINK: A tool set for whole-genome association and  
410 population-based linkage analyses. *Am J Hum Genet*. 2007;81(3):559-575.
- 411 34. Littlejohns TJ, Holliday J, Gibson LM, et al. The UK Biobank imaging enhancement of 100,000  
412 participants: rationale, data collection, management and future directions. *Nat Commun*.  
413 2020;11(1):2624.
- 414 35. Ashburner J, Friston KJ. Unified segmentation. *Neuroimage*. 2005;26(3):839-851.
- 415 36. Chen J, Calhoun VD, Lin D, et al. Shared Genetic Risk of Schizophrenia and Gray Matter  
416 Reduction in 6p22.1. *Schizophr Bull*. 2019;45(1):222-232.
- 417 37. Bell AJ, Sejnowski TJ. An Information Maximization Approach to Blind Separation and Blind  
418 Deconvolution. *Neural Comput*. 1995;7(6):1129-1159.
- 419 38. Amari S. Natural Gradient Works Efficiently in Learning. *Neural Comput*. 1998;10:251-276.
- 420 39. Chen JY, Li X, Calhoun VD, et al. Sparse deep neural networks on imaging genetics for  
421 schizophrenia case-control classification. *Hum Brain Mapp*. 2021;42(8):2556-2568.
- 422 40. Xu L, Groth KM, Pearlson G, Schretlen DJ, Calhoun VD. Source-Based Morphometry: The Use  
423 of Independent Component Analysis to Identify Gray Matter Differences With Application to  
424 Schizophrenia. *Hum Brain Mapp*. 2009;30(3):711-724.
- 425 41. Du Y, Fu Z, Sui J, et al. NeuroMark: An automated and adaptive ICA based pipeline to identify  
426 reproducible fMRI markers of brain disorders. *NeuroImage: Clinical*. 2020;28:102375.
- 427 42. Collister JA, Liu X, Clifton L. Calculating polygenic risk scores (PRS) in UK Biobank: a  
428 practical guide for epidemiologists. *Frontiers in genetics*. 2022;13:105.
- 429 43. Bourgon R, Gentleman R, Huber W. Independent filtering increases detection power for high-  
430 throughput experiments. *Proceedings of the National Academy of Sciences*. 2010;107(21):9546-  
431 9551.

432

433 **Supplemental Figure**

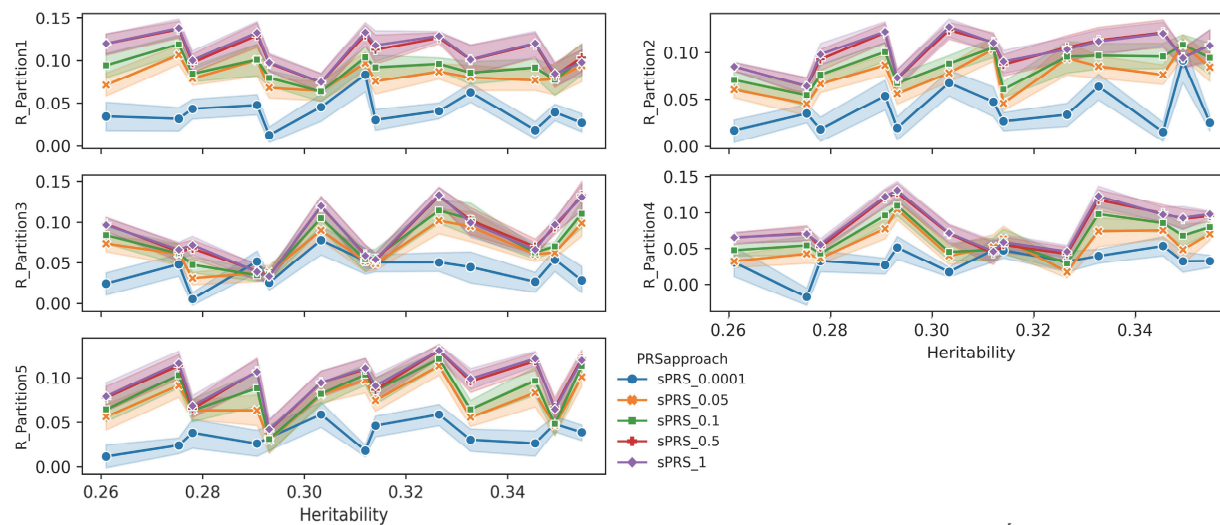

434  
435 Figure S1: Prediction accuracies observed across all the training sample sizes for individual brain phenotypes and individual  
436 random partitions. Each subplot shows the performance of one random partition, where each data point represents a specific brain  
437 phenotype and shows the mean and standard error of the prediction accuracies across 29 tested training sample sizes.
